# Supplementary material for: Promoting the four electrocatalytic reactions of OER/ORR/HER/MOR using a multi-component metal sulfide heterostructure for zinc-air batteries and water-splitting
Source: Royal Society of Chemistry journal article supplement (doi:10.1039/d3nr05581g), 2024-01-01
Supplement: d3nr05581g1.pdf [file d3nr05581g1.pdf]

## Supporting Information

**Promoting the four electrocatalytic reactions of OER/ORR/HER/MOR by using  
multi-component metal sulfide heterostructure for the zinc-air batteries and  
water splitting**

Jiabin Dang <sup>a</sup>, Genman Chen <sup>a</sup>, Bingen Yuan <sup>a</sup>, Fuyue Liu <sup>a</sup>, Qin Wang <sup>b</sup>, Fu Wang <sup>a</sup>,

He Miao <sup>a,\*</sup>, Jinliang Yuan <sup>a</sup>

<sup>a</sup> Faculty of Maritime and Transportation, Ningbo University, Ningbo 315211, PR  
China

<sup>b</sup> Department of Microelectronic Science and Engineering, Faculty of Science,  
Ningbo University, Ningbo 315211, PR China

\* Corresponding authors:

Prof. He Miao, E-mail: [miaohe@nbu.edu.cn](mailto:miaohe@nbu.edu.cn)

## 1. Reagents and chemicals

Cobalt nitrate ( $\text{Co}(\text{NO}_3)_2 \cdot 6\text{H}_2\text{O}$ ), Sodium sulphate ( $\text{Na}_2\text{SO}_4$ ), Amino thiourea ( $\text{CH}_5\text{N}_3\text{S}$ ), Nafion (5 wt.%), polytetrafluoroethylene (PTFE), anhydrous ethanol ( $\text{C}_2\text{H}_5\text{OH}$ ), carbon (XC-72), acrylamide (AM), ammonium persulfate (APS), N, N'-Methylenebis (acrylamide) (MBA), acrylic acid (AA), dimethyl sulfoxide (DMSO), glycerol ( $\text{C}_3\text{H}_8\text{O}_3$ ), cellulose nanofibers, polyvinyl alcohol (PVA), potassium hydroxide (KOH), anhydrous methanol ( $\text{CH}_3\text{OH}$ ), zinc acetate ( $\text{Zn}(\text{Ac})_2$ ), and zinc foil (thickness of 0.15 mm) were supplied by Aladdin Industrial Co., Ltd. (Shanghai, China). Among them, all chemical reagents were analytical grade. Iron-nickel foam (INF, Ni: Fe = 3: 7, thickness of 1.5 mm) was obtained from Suzhou Keshenghe Metal Materials Co., Ltd. Cobalt foil (thickness of 0.1 mm) was purchased from Qinghe County Lisheng Metal Materials Co., Ltd. (Purity of 99.9%). All chemicals were used as received without further purification. The water used in all experiments was ultrapure ( $18.2 \text{ M}\Omega \cdot \text{cm}$ ). Seawater was taken from the East China Sea,  $29^\circ 52' 00.00'' \text{ N}$ ,  $121^\circ 31' 00.00'' \text{ E}$ .

## 2. Material characterizations

X-ray diffraction (XRD) patterns were obtained on a Bruker D8 Advance X-ray diffractometer ( $\text{Cu K}\alpha = 1.5418 \text{ \AA}$ ) at a scanning rate of  $0.02^\circ \text{ s}^{-1}$  from  $20^\circ$  to  $90^\circ$ . The microstructure and elemental distribution of the synthesized samples were observed using field emission scanning electron microscopy (FESEM, Hitachi S4800, 5 kV), transmission electron microscopy (TEM, JF-20, Hitachi), and high-resolution transmission electron microscopy (HRTEM, JF-20, Hitachi). X-ray photoelectron

spectroscopy (XPS) was performed on an AXISULTARDLD spectroscopy spectrometer with an Al-K $\alpha$  X-ray source.

### **3. Electrochemical measurements**

The working electrode was subjected to electrochemical LSV testing using a standard three-electrode system on the electrochemical workstation CHI 760 E (Shanghai Chenhua Instrument Co., Ltd.) at room temperature of  $25 \pm 0.2$  °C. The working electrode was either a self-supported sample ( $1 \times 1$  cm<sup>2</sup>) prepared in the experiment or a catalyst-coated rotating disc electrode (RDE) (0.196 cm<sup>2</sup>). The reference electrode was Hg/HgO, and the counter electrode was a graphite rod. The graphite rod and Hg/HgO electrodes were provided by Shanghai Ledun Industrial Co., Ltd and CHI Instruments, Inc, respectively. 0.1/1.0 M KOH solution was used as electrolyte. The catalyst slurry for preparing the working electrode with RDE was a mixed solution containing 5 mg sample powder (scraped from INF), 5 mg carbon (Vulcan XC-72), 80  $\mu$ L 5 wt.% Nafion and 2 mL ethanol. After sufficiently ultrasonic mixing, 20  $\mu$ L of the dispersion was extracted and uniformly dropped on the glassy carbon (GC) electrode.

For the preparation of the Pt/C ink, 5 mg Pt/C (20 wt.%) and 80  $\mu$ L Nafion (5 wt.%) were dispersed in 2 mL ethanol solution through ultrasonic treatment. For the preparation of the RuO<sub>2</sub> ink, 5 mg RuO<sub>2</sub>, 5 mg carbon (Vulcan-XC72) and 80  $\mu$ L Nafion (5 wt.%) were dispersed in 2 mL ethanol solution through ultrasonic treatment. The inks were evenly dropped on INF ( $1 \times 1$  cm<sup>2</sup>) to prepare the working electrodes with catalyst loading of 2 mg cm<sup>-2</sup>,

and marked as 20% Pt/C-INF and RuO<sub>2</sub>-INF, respectively.

The OER LSV tests were performed in an O<sub>2</sub>-saturated 1.0 M KOH solution with a potential range of 0.2 to 1.0 V (vs. Hg/HgO) and a scan rate of 5 mV s<sup>-1</sup>. The electrodes were activated by the CV scanning before measuring the OER performances. Similarly, the ORR LSV tests were carried out in O<sub>2</sub>-saturated 0.1 M KOH solution with a potential range of -0.8 to 0.2 V (vs. Hg/HgO). The HER LSV tests were carried out in N<sub>2</sub>-saturated 1.0 M KOH solution with a potential range of -1.6 to -0.8 V (vs. Hg/HgO). The MOR LSV tests were performed in an N<sub>2</sub>-saturated in 1.0 M KOH + 1.0 M methanol mixed solution with a potential range of 0.2 to 1.0 V (vs. Hg/HgO) and a scan rate of 5 mV s<sup>-1</sup>. In the above tests, the LSV curves of OER, ORR, HER and MOR were all tested in the electrolytic cell with the self-supported catalysts, and the ORR LSV curves of the samples were also tested with RDE for comparing with the self-supported catalysts. IR compensation was performed on all the working electrodes, and the following formula was used to convert all recorded potentials into RHE [1]:  $E_{\text{RHE}} = E_{\text{Hg/HgO}} + 0.059 \times \text{pH} + 0.098$ . Among them, at 25 °C, the overpotential of OER ( $\eta$ ) can be determined by the formula:  $\eta = E_{\text{RHE}} - 1.23$ .

The Tafel slopes were obtained from their corresponding linear sweep voltammetry (LSV) by plotting overpotential ( $\eta$ ) to the log current ( $j$ ). The Tafel slopes were calculated from equation  $\eta = b \cdot \log j + a$  ( $b$  is the Tafel slope, and  $a$  is a constant) [2].

Chronopotentiometry (CP) tests were adopted to analyze the voltage variation of the working electrode over time within 40000 s to evaluate the OER and HER stability in 1.0 M KOH at a constant current density (100 mA cm<sup>-2</sup>). Chronoamperometry (CA) tests were used to record the changes in current density of the working electrode over 60000 s to evaluate the ORR durability of the catalysts in 0.1 M KOH solution at the constant voltage (-0.5 V (vs. Hg/HgO)). The CP tests were adopted to analyze the voltage variation of the working electrode over 100000 s to evaluate the MOR durability in 1.0 M KOH + 1.0 M methanol at a constant current (100 mA cm<sup>-2</sup>).

In order to measure the electrochemical impedance spectroscopy (EIS) of catalysts, the same testing conditions with LSV were configured. The catalysts were used as the working electrode, and an anodic polarization potential of 1.462 V (vs. RHE) was applied to the working electrode. The frequency collection range was set to 10<sup>-2</sup> - 10<sup>5</sup> Hz, and the amplitude was set to 5 mV. The tests were conducted on the electrochemical workstation CHI 760 E. Then, the key electrochemical kinetic parameters to evaluate the performance of the catalysts were obtained, that is, the charge transfer resistance ( $R_{ct}$ ) between the electrode interface and the electrolyte. For EIS testing during MOR, the electrolyte was adopted to a 1.0 M KOH + 1.0 M methanol mixed solution with the applied anode potential of 1.55 V (vs. RHE), while the other testing conditions remained unchanged. For the

measurement of the electrochemical double-layer capacitance ( $C_{dl}$ ) of catalysts, CV scans of the samples at different scanning rates (10 to 100 mV s<sup>-1</sup>) in the potential range of 0.877 to 0.977 V (vs. RHE) were performed in 1.0 M KOH solution. The scanning rate was used as the x-axis, and half of the upper and lower current density corresponding to the intermediate potential values in the scanning interval ( $\Delta j = (j_{anode} - j_{cathode})/2$ ) was used as the y-axis. Then, by fitting the curve, the slope that is the  $C_{dl}$  can be obtained. In general, the electrochemically active surface area (ECSA) is

proportional to  $C_{dl}$  [3, 4]:  $ECSA = \frac{C_{dl}}{C_s} \cdot l$  Among them,  $C_s$  is the specific capacitance per unit of actual surface area, often replaced by empirical values under assumed conditions.

As mentioned above, the capacitance value of the double layer is related

to current density and scanning rate [5]:  $C_{dl} = \frac{\Delta j}{\nu}$ . Where  $\Delta j$  represents the capacitance current density,  $\nu$  stands for the scanning rate.

For the ECSA tests toward MOR, the electrolyte was used as 1.0 M KOH+1.0 M methanol mixed solution, and the potential range of 0.867 to 0.967 V (vs. RHE) was set, while the other test conditions kept unchanged.

#### **4. Synthesis of hydrophobic layer**

200 g of ethanol was mixed with 6 g of carbon black (Vulcan XC72), and stirred thoroughly at room temperature (25 ± 0.2 °C) for half an hour. Heat the solution to 35 °C and drop polytetrafluoroethylene concentrated dispersion (PTFE, 60 wt.%) into it. After the flocculent precipitate was

formed, press it into the sheets (0.5 mm thickness), and heat it in a annealing furnace at 350 °C for 2 h to finally obtain the hydrophobic layer.

### **5. Synthesis of solid gel electrolyte**

The preparation method of alkaline gel electrolyte was as the follows: 8 mg MBA, 10 mg APS, 10 g AM and 8 g cellulose nanofibers were added into a mixed solution of 8 g glycerin and 8 g deionized water at room temperature, and fully stirred to form solution A. Mix 0.64 g of PVA with 5.76 g of deionized water in a high-temperature water bath to form the PVA solvent, and then mix 0.96 g of PVA solvent with 8.64 g of DMSO solution in a high-temperature water bath to form solution B. At room temperature, mix the A and B solution, and then add 1 g AA (acrylic acid) into the mixed solution. After the completely stirring, pour it into a petri dish, and heat it in an oven at 80 °C for 1 h to form solid gel (4 mm thickness). Soak it into 6 M KOH + 0.2 M Zn(Ac)<sub>2</sub> solution for 20 h at room temperature to obtain the solid gel electrolyte.

### **6. Assemblies and measurements of ZABs**

To estimate the practical applications of the prepared catalysts, they were used as the cathode materials and assembled into aqueous and flexible ZABs. In aqueous ZABs, zinc foil (0.15 mm thickness, 3 × 3 cm<sup>2</sup>), 6 M KOH+0.2 M Zn(Ac)<sub>2</sub>, and Co-S-INF (or other sample, 1 × 1 cm<sup>2</sup>) electrode were sequentially assembled as the anode, electrolyte, and cathode of the battery, respectively. In the flexible battery, zinc foil (0.15 mm thickness,

2 × 2 cm<sup>2</sup>), gel electrolyte and Co-S-INF (1 × 1 cm<sup>2</sup>) electrode were assembled as anode, electrolyte and cathode, respectively [6].

All battery tests were conducted at room temperature by using a multi-channel battery testing system (LAND CT2001A, Wuhan Land Electronics Co., Ltd., China). The charge/discharge polarization curves and corresponding power density curves of ZABs at different current densities (mA cm<sup>-2</sup>) were obtained. To evaluate the cycling stability of ZABs, the tests were conducted at different current densities and cycling times. In aqueous ZAB, the cycle was conducted for 30 min (15 min charge and 15 min discharge) at a current density of 10 mA cm<sup>-2</sup>. Additionally, the high current and long-term cycling tests were also conducted (at different current densities of 25 and 50 mA cm<sup>-2</sup>, each cycle lasted for 60 min). In flexible solid-state batteries, in addition cycling for 30 min (15 min charge and 15 min discharge) at 10 mA cm<sup>-2</sup>, the cycling measurements were also conducted at 5 mA cm<sup>-2</sup> for 10 min (5 min charge and 5 min discharge) per cycle. The specific capacity (mAh g<sub>Zn</sub><sup>-1</sup>) of aqueous and flexible ZABs at different current densities of 50 and 10 mA cm<sup>-2</sup> were measured by using

the formula: 
$$C = \frac{It}{m}$$

Where, C, I, t and m represent specific capacity (mAh g<sub>Zn</sub><sup>-1</sup>), current (mA), discharge time (h), and consumed zinc mass (g), respectively.

## 7. Product analysis



Nuclear magnetic resonance (Ascend 600) was used to analyze the product contents of MOR. First, a series of potassium formate (HCOOK) solutions with the different concentrations (0.5 mM, 1 mM, 1.5 mM, 2 mM, 2.5 mM) were prepared. 500  $\mu\text{L}$  of potassium formate solution and 200  $\mu\text{L}$  of  $\text{D}_2\text{O}$  (deuterium oxide) were added into a NMR tube, and mixed thoroughly for NMR test. A standard curve was drawn based on the proportional relationship between the integrated intensity of the formate ion signal peak and the concentration of formate ion. Typically, for the analysis of the product in the electrolyte, 500  $\mu\text{L}$  of electrolyte and 200  $\mu\text{L}$  of  $\text{D}_2\text{O}$  were added in a NMR tube, and mix them thoroughly. Then the nuclear magnetic resonance test was performed to obtain the integrated intensity of the formate ion signal. The content of formate produced was calculated according to the standard curve [7].

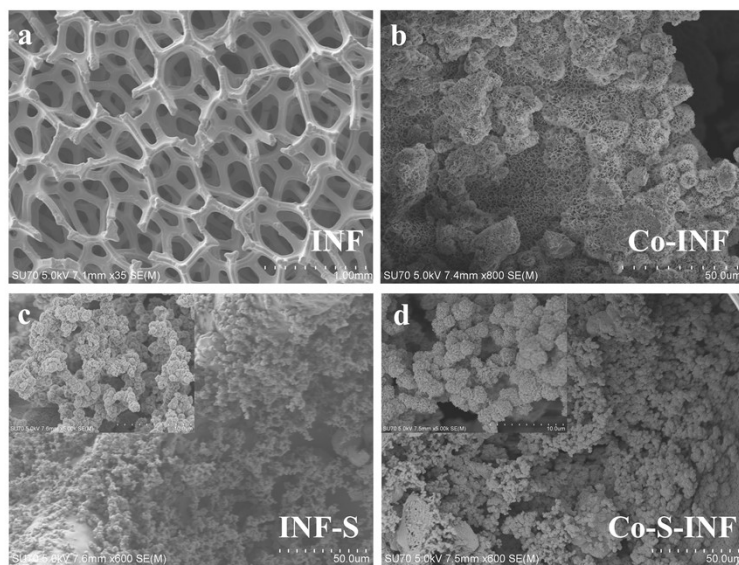

**Fig. S1.** SEM images of INF (a), Co-INF (b), INF-S (c), and Co-S-INF (d).

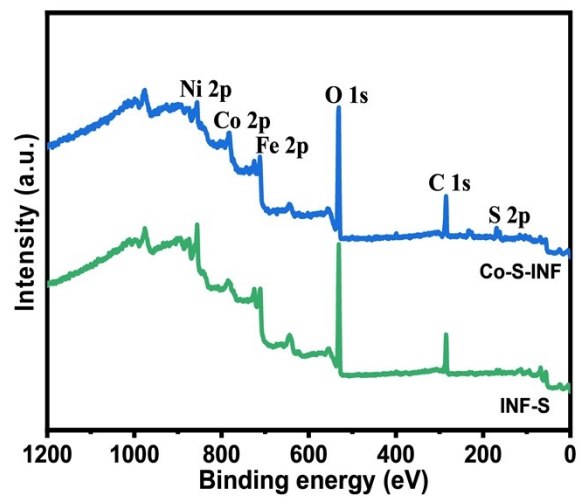

Fig. S2. XPS spectrum of Co-S-INF and INF-S.

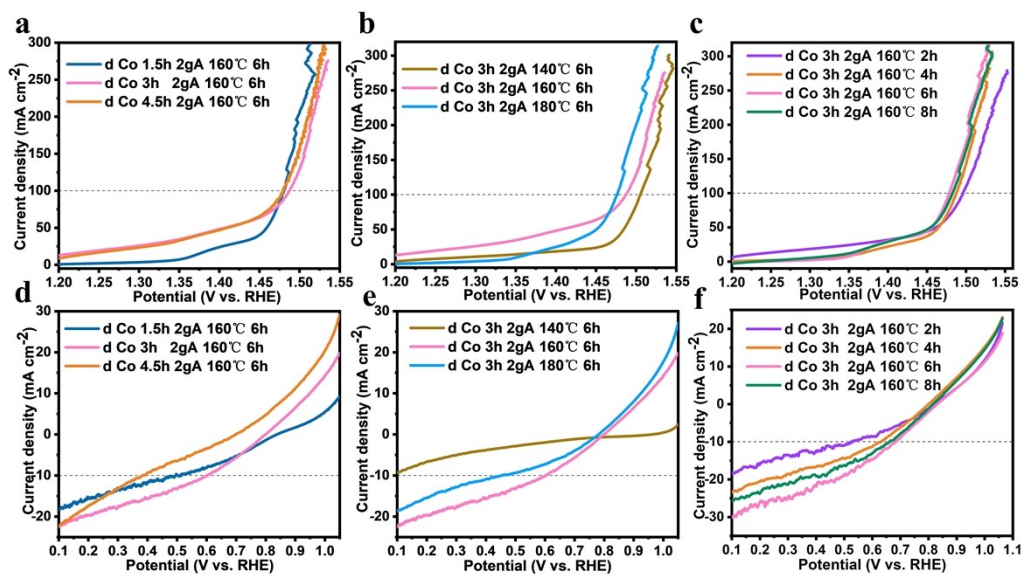

**Fig. S3.** OER (a) and ORR (d) LSV curves of Co-S-INF synthesized at the different electrodeposition times. OER (b) and ORR (e) LSV curves of Co-S-INF synthesized at different hydrothermal temperatures. OER (c) and ORR (f) LSV curves of Co-S-INF synthesized at different hydrothermal times.

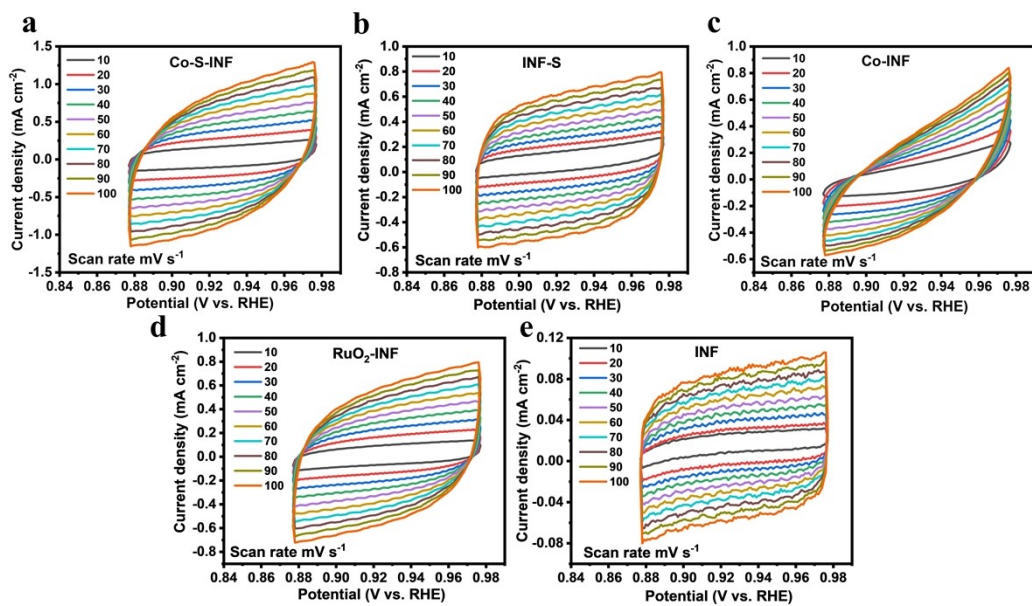

**Fig. S4.** CV curves of Co-S-INF (a), INF-S (b), Co-INF (c), RuO<sub>2</sub>-INF (d), and INF (e) at the scan rates of 10-100 mV s<sup>-1</sup>

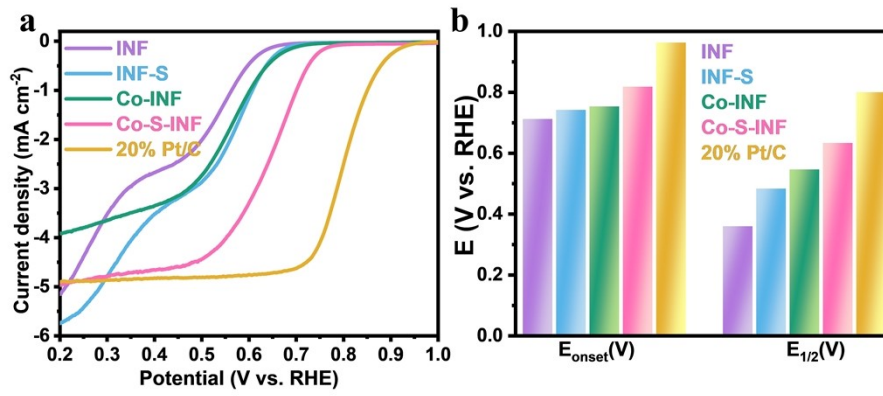

**Fig. S5.** (a) ORR LSV curves of Co-S-INF, INF-S, Co-INF, 20% Pt/C, and INF measured on RDE. (b)  $E_{\text{onset}}$  and  $E_{1/2}$  of Co-S-INF, INF-S, Co-INF, 20% Pt/C, and INF measured on RDE.

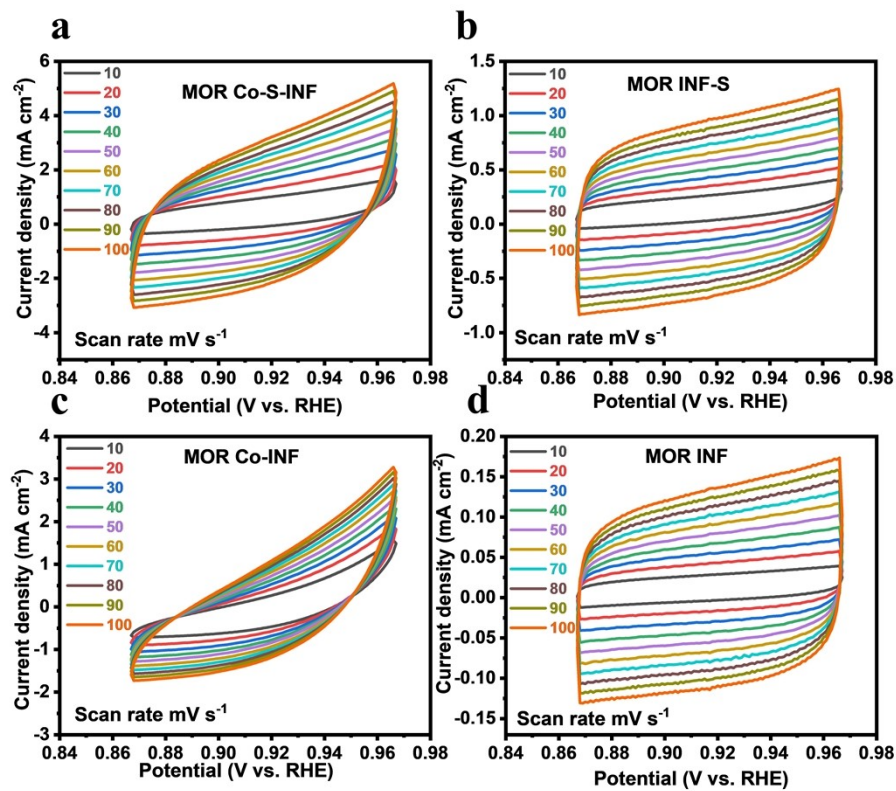

**Fig. S6.** CV curves of Co-S-INF (a), INF-S (b), Co-INF (c) and INF (d) at scan rates of 10-100 mV s<sup>-1</sup> in 1.0 M KOH + 1.0 M methanol solution.

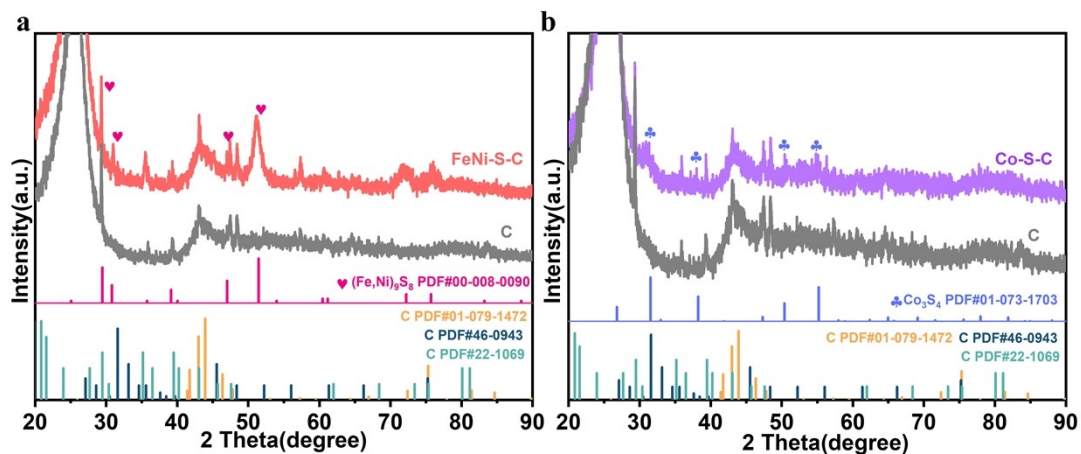

Fig. S7. XRD patterns of (a) FeNi-S-C and (b) Co-S-C.

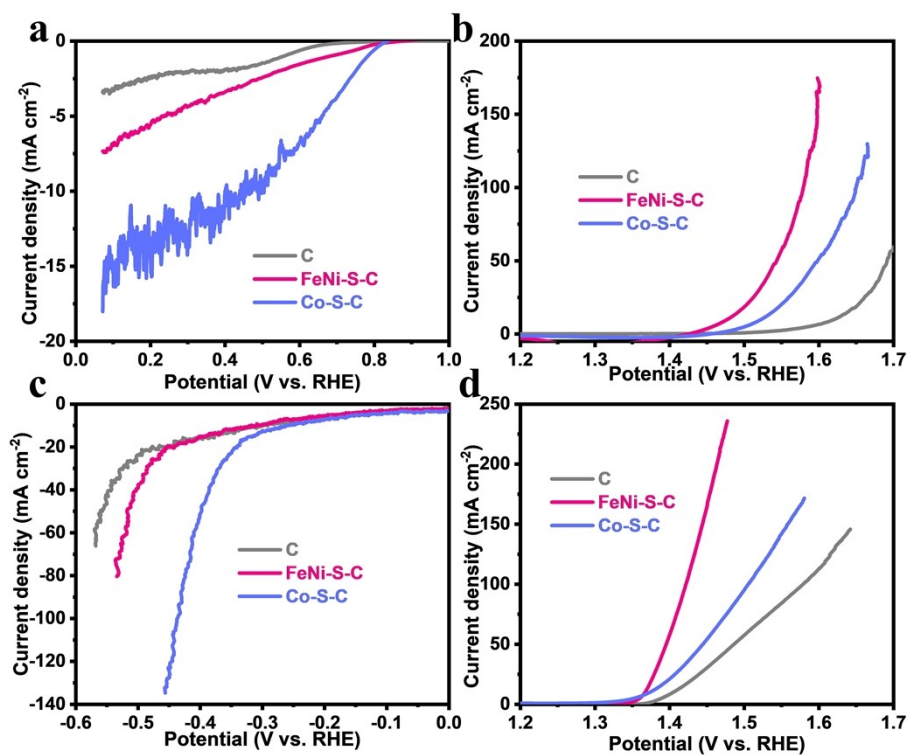

Fig. S8. (a) ORR, (b) OER, (c) HER, (d) MOR LSV curves after  $iR$ -compensated of FeNi-S-C, Co-S-C and carbon cloth.

we have synthesized the single  $\text{Co}_3\text{S}_4$  and  $(\text{Fe}, \text{Ni})_9\text{S}_8$  phases on the inactive carbon cloth substrate, which named as Co-S-C and FeNi-S-C,



respectively (**Fig. S7**), and subsequently tested their LSV curves toward OER, ORR, HER and MOR. As can be seen in **Fig. S8**, the OER and MOR activities of FeNi-S-C are higher than that of Co-S-C. While, the ORR and HER activities of Co-S-C are higher than that of FeNi-S-C.

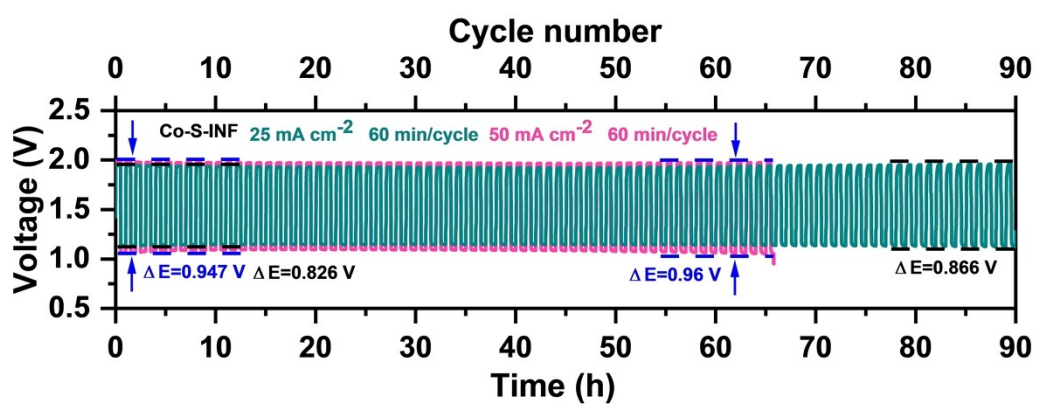

**Fig. S9.** Cyclic stability curves of the aqueous ZAB with Co-S INF as cathode: 30 min charge and 30 min discharge at 25 mA cm<sup>-2</sup> and 50 mA cm<sup>-2</sup>, respectively.

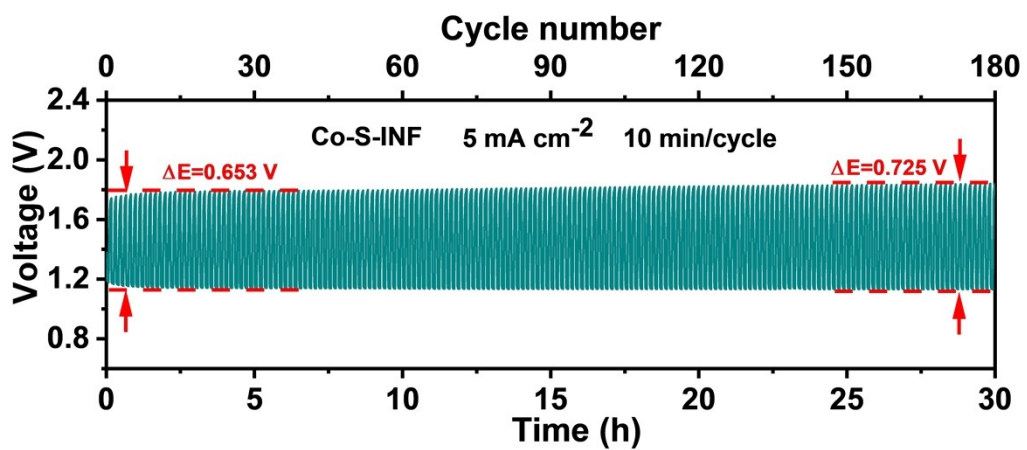

**Fig. S10.** Cyclic stability curves of the flexible ZAB with Co-S INF as cathode: 5 min charge and 5 min discharge at 5 mA cm<sup>-2</sup>.

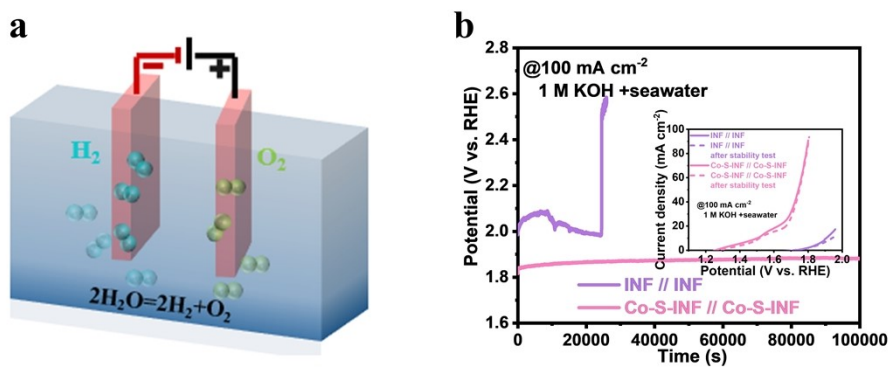

**Fig. S11.** Schematic illustration of the electrolysis cell with Co-S-INF as both cathode and anode (a). Stability curves of the electrolysis cell with Co-S-INF// Co-S-INF and INF//INF at  $100 \text{ mA cm}^{-2}$  in the natural seawater. The inset shows polarization curves of overall water splitting before and after stability tests (b).

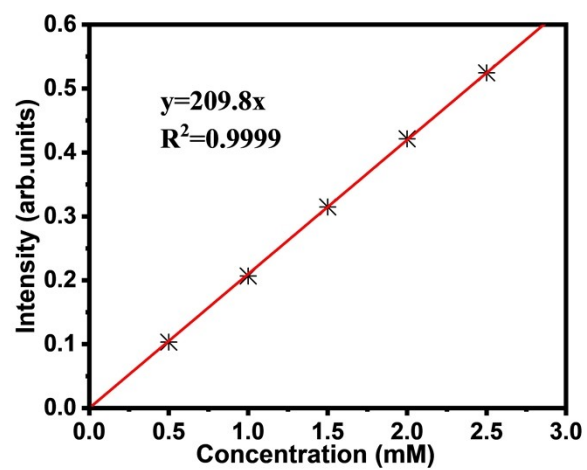

**Fig. S12.** Standard curve for the formate quantification.

**Tab. S1.** Co 2p XPS quantitative analyses of Co-S-INF and Co<sub>3</sub>O<sub>4</sub>.

| Samples                        | Co <sup>2+</sup> (%) | Co <sup>3+</sup> (%) | Co <sup>3+</sup> /Co <sup>2+</sup> | Average valence of Co |
|--------------------------------|----------------------|----------------------|------------------------------------|-----------------------|
| Co-S-INF                       | 44.99%               | 55.01%               | 1.22                               | 2.55                  |
| Co <sub>3</sub> O <sub>4</sub> | 39.12%               | 60.88%               | 1.56                               | 2.61                  |

**Tab. S2.** Fe 2p XPS quantitative analyses of Co-S-INF and INF-S.

| Samples  | Fe <sup>2+</sup> (%) | Fe <sup>3+</sup> (%) | Fe <sup>3+</sup> /Fe <sup>2+</sup> | Average valence of Fe |
|----------|----------------------|----------------------|------------------------------------|-----------------------|
| Co-S-INF | 50.18%               | 49.82%               | 0.99                               | 2.50                  |
| INF-S    | 55.97%               | 44.03%               | 0.79                               | 2.44                  |

**Tab. S3.** Ni 2p XPS quantitative analyses of Co-S-INF and INF-S.

| Samples  | Ni <sup>2+</sup> (%) | Ni <sup>3+</sup> (%) | Ni <sup>3+</sup> /Ni <sup>2+</sup> | Average valence of Ni |
|----------|----------------------|----------------------|------------------------------------|-----------------------|
| Co-S-INF | 55.49%               | 44.51%               | 0.80                               | 2.45                  |
| INF-S    | 67.14%               | 32.86%               | 0.49                               | 2.33                  |

**Tab. S4.** Comparisons of the OER catalytic performances of the different metal sulfides including our Co-S-INF.

| Samples                                                                              | solutions | OER<br>overpotential ( mV ) @100 mA<br>cm <sup>-2</sup> | References |
|--------------------------------------------------------------------------------------|-----------|---------------------------------------------------------|------------|
| Co-S-INF                                                                             | 1 M KOH   | 248                                                     | This work  |
| B-TS-H@T-B                                                                           | 1 M KOH   | 420                                                     | [8]        |
| (Ni, Fe)S <sub>2</sub> @MoS <sub>2</sub>                                             | 1 M KOH   | 330                                                     | [9]        |
| Ni <sub>3</sub> S <sub>2</sub> /FeNi <sub>2</sub> S <sub>4</sub> -NiFe foam          | 1 M KOH   | 239                                                     | [10]       |
| Fe <sub>0.9</sub> Ni <sub>2.1</sub> S <sub>2</sub> @NF                               | 1 M KOH   | 252                                                     | [11]       |
| CuCo-Ni <sub>3</sub> S <sub>2</sub> /NF                                              | 1 M KOH   | 400                                                     | [12]       |
| Cu@CoS <sub>x</sub> /Cu Foam                                                         | 1 M KOH   | 310                                                     | [13]       |
| Ni <sub>x</sub> Co <sub>3-x</sub> S <sub>4</sub> /Ni <sub>3</sub> S <sub>2</sub> /NF | 1 M KOH   | 320                                                     | [14]       |
| Fe <sub>0.8</sub> Ni <sub>0.15</sub> S <sub>1.05</sub>                               | 1 M KOH   | 330                                                     | [15]       |
| Cu <sub>2</sub> O@Fe-Ni <sub>3</sub> S <sub>2</sub> /Cu foam                         | 1 M KOH   | 250                                                     | [16]       |
| Fe-Ni <sub>3</sub> S <sub>2</sub> /OXs                                               | 1 M KOH   | 260                                                     | [17]       |

**Tab. S5.**  $R_{ct}$  values of the samples.

| Catalysts             | $R_{ct}/\Omega$ |
|-----------------------|-----------------|
| INF                   | 35.6            |
| INF-S                 | 1.5             |
| Co-INF                | 2.1             |
| Co-S-INF              | 1.1             |
| RuO <sub>2</sub> -INF | 17.7            |



**Tab. S6.** Property comparisons of ZABs with the Co-S-INF and other reported catalysts.

| Electrodes                                               | Peak power density (mW cm <sup>-2</sup> ) | Charge/discharge voltage gap (V) @ 100 mA cm <sup>-2</sup> | Charge/discharge voltage gap (V) @ 200 mA cm <sup>-2</sup> | References |
|----------------------------------------------------------|-------------------------------------------|------------------------------------------------------------|------------------------------------------------------------|------------|
| Co-S-INF                                                 | 332.3                                     | 0.57                                                       | 1.05                                                       | This work  |
| Fe <sub>1</sub> Co <sub>1</sub> S <sub>x</sub> @NSPC     | 159.0                                     | --                                                         | --                                                         | [18]       |
| CoMn <sub>2</sub> O <sub>4</sub> -S <sub>2</sub>         | 108.3                                     | --                                                         | --                                                         | [19]       |
| CoMn <sub>1.5</sub> Ni <sub>0.5</sub> O <sub>4</sub>     | 147.4                                     | 1.40                                                       | 1.90                                                       | [20]       |
| BSCCF-NF-H                                               | 130.5                                     | 1.25                                                       | 1.65                                                       | [21]       |
| Co <sub>9</sub> S <sub>8</sub> -FeS <sub>2</sub> @N-CNFs | 214.0                                     | 1.40                                                       | 1.50                                                       | [22]       |
| NiCo <sub>2</sub> Se <sub>4</sub> /NiCoS <sub>4</sub>    | 83.5                                      | 1.36                                                       | 1.87                                                       | [23]       |
| Ni <sub>3</sub> S <sub>4</sub> @CoS <sub>x</sub> -NF     | 143.0                                     | 0.69                                                       | 2.30                                                       | [24]       |
| (Fe, Co, Ni) <sub>9</sub> S <sub>8</sub> /NSCFs          | 158                                       | 1.29                                                       | --                                                         | [25]       |
| SNCF-Mn-S <sub>4</sub>                                   | 129.4                                     | 1.37                                                       | 1.87                                                       | [26]       |
| CoFe@NC/KB-800                                           | 160                                       | 0.98                                                       | 1.42                                                       | [27]       |

**Tab. S7.** Property comparisons of the flexible solid-state ZABs with the Co-S-INF and other reported catalysts.

| Electrodes                                           | Peak power density (mW cm <sup>-2</sup> ) | Charge/discharge voltage gap (at 100 mA cm <sup>-2</sup> ) | Specific capacity (mAh g <sub>Zn</sub> <sup>-1</sup> ) | References |
|------------------------------------------------------|-------------------------------------------|------------------------------------------------------------|--------------------------------------------------------|------------|
| Co-S-INF                                             | 160.5                                     | 1.00                                                       | 778.9                                                  | This work  |
| INF-FeCuS                                            | 130.0                                     | 0.92                                                       | 777.1                                                  | [28]       |
| Fe <sub>1</sub> Co <sub>1</sub> S <sub>x</sub> @NSPC | 71.0                                      | --                                                         | 770.0                                                  | [18]       |
| CoFe-SNC                                             | 51.5                                      | --                                                         | --                                                     | [29]       |
| Mn-Ni <sub>3</sub> S <sub>2</sub> /NF                | 75.8                                      | 1.42                                                       | 598.0                                                  | [6]        |
| CoMn <sub>1.5</sub> Ni <sub>0.5</sub> O <sub>4</sub> | 85.8                                      | 1.25                                                       | --                                                     | [20]       |
| BSCCF-NF-H                                           | 81.7                                      | 1.33                                                       | 705.0                                                  | [21]       |
| MnCo <sub>2</sub> O <sub>4</sub>                     | 60.3                                      | 1.63                                                       | --                                                     | [30]       |
| Ni <sub>3</sub> S <sub>4</sub> @CoS <sub>x</sub> -NF | 100.1                                     | 1.22                                                       | 775.0                                                  | [24]       |
| CoxSy/SNC-800                                        | 136.0                                     | 1.35                                                       | 777.0                                                  | [31]       |

**Tab. S8.** Calculation of Faradaic efficiencies of the cathode and anode products in the electrolysis cell with Co-S-INF//Co-S-INF during the alkaline water splitting.

| Current density         | Time (min) | Theoretical H <sub>2</sub> (mmol) | Detected H <sub>2</sub> (mmol) | Faradaic efficiency (H <sub>2</sub> , %) | Theoretical O <sub>2</sub> (mmol) | Detected O <sub>2</sub> (mmol) | Faradaic efficiency (O <sub>2</sub> , %) |
|-------------------------|------------|-----------------------------------|--------------------------------|------------------------------------------|-----------------------------------|--------------------------------|------------------------------------------|
| 100 mA cm <sup>-2</sup> | 10         | 0.311                             | 0.306                          | 98.39                                    | 0.156                             | 0.152                          | 97.44                                    |
|                         | 20         | 0.622                             | 0.614                          | 98.71                                    | 0.311                             | 0.305                          | 98.07                                    |
|                         | 30         | 0.933                             | 0.922                          | 98.82                                    | 0.466                             | 0.458                          | 98.28                                    |
|                         | 40         | 1.244                             | 1.234                          | 99.20                                    | 0.622                             | 0.617                          | 99.20                                    |
|                         | 50         | 1.555                             | 1.540                          | 99.04                                    | 0.777                             | 0.771                          | 99.23                                    |
|                         | 60         | 1.866                             | 1.846                          | 98.93                                    | 0.933                             | 0.919                          | 98.50                                    |

The Faradaic efficiencies of H<sub>2</sub> and O<sub>2</sub> in the electrolysis cell with Co-S-INF as both anode and cathode in 1.0 M KOH electrolyte are measured in a closed electrochemical cell, and the collected H<sub>2</sub> or O<sub>2</sub> gas products are measured by the drainage method. Each collection is repeated at least three times, and the average value is presented. Then, the value of the Faradaic efficiency is calculated based on the following formula [32, 33] :

$$\text{Faraday efficiency} = (m_{\text{Detected}} / m_{\text{Theoretical}}) * 100\%$$

$$m_{\text{Theoretical}} = (I * t) / (n * F)$$

Where the  $m$  is the actual mole numbers of the product,  $n$  is the number of transferred electrons ( $n = 4$  for O<sub>2</sub>,  $n = 2$  for H<sub>2</sub>),  $F$  is the Faraday constant ( $F=96485.3$  C mol<sup>-1</sup>),  $I$  is current (100 mA cm<sup>-2</sup>),  $t$  is time, and the measurement is at ambient temperature.

**Tab. S9.** Calculation of Faradaic efficiency of cathode products during the MOR-assisted water splitting.

| Current density         | Time (min) | Theoretical           | Detected H <sub>2</sub> | Faradaic efficiency (H <sub>2</sub> , %) |
|-------------------------|------------|-----------------------|-------------------------|------------------------------------------|
|                         |            | H <sub>2</sub> (mmol) | (mmol)                  |                                          |
| 100 mA cm <sup>-2</sup> | 5          | 0.1555                | 0.1540                  | 99.04                                    |
|                         | 10         | 0.3109                | 0.3094                  | 99.52                                    |
|                         | 15         | 0.4664                | 0.4603                  | 98.69                                    |
|                         | 20         | 0.6219                | 0.6205                  | 99.77                                    |
|                         | 25         | 0.7773                | 0.7723                  | 99.36                                    |
|                         | 30         | 0.9328                | 0.9241                  | 99.07                                    |
|                         | 35         | 1.0883                | 1.0759                  | 98.86                                    |
|                         | 40         | 1.2437                | 1.2277                  | 98.71                                    |

The Faradaic efficiency of H<sub>2</sub> produced in the electrolysis cell with Co-S-INF// Co-S-INF in the mixed solution of 1.0 M KOH + 1.0 M methanol is measured in a closed electrochemical cell, and the collected H<sub>2</sub> gas products is measured by the drainage method.

## References

- [1] H. Ge, G. Li, J. Shen, W. Ma, X. Meng, L. Xu, Co<sub>4</sub>N nanoparticles encapsulated in N-doped carbon box as tri-functional catalyst for Zn-air battery and overall water splitting, *Appl. Catal., B.* 275 (2020) 119104. <https://doi.org/10.1016/j.apcatb.2020.119104>.
- [2] D. Chinnadurai, S.J. Lee, Y. Yu, S.Y. Nam, M.Y. Choi, Cation modulation in dual-phase nickel sulfide nanospheres by pulsed laser irradiation for overall water splitting and methanol oxidation reaction, *Fuel* 320 (2022) 123915. <https://doi.org/10.1016/j.fuel.2022.123915>.
- [3] H. Deng, C. Zhang, Y. Xie, T. Tumlin, L. Giri, S.P. Karna, J. Lin, Laser induced MoS<sub>2</sub>/carbon hybrids for hydrogen evolution reaction catalysts, *J. Mater. Chem. A* 4 (2016) 6824-6830. <https://doi.org/10.1039/c5ta09322h>.
- [4] N. Jiang, Q. Tang, M. Sheng, B. You, D. Jiang, Y. Sun, Nickel sulfides for electrocatalytic hydrogen evolution under alkaline conditions: a case study of crystalline NiS, NiS<sub>2</sub>, and Ni<sub>3</sub>S<sub>2</sub> nanoparticles, *Catal. Sci. Technol.* 6 (2016) 1077-1084. <https://doi.org/10.1039/c5cy01111f>.
- [5] F. Zhang, T. Liu, J. Zhang, E. Cui, L. Yue, R. Jiang, G. Hou, The potassium hydroxide-urea synergy in improving the capacitive energy-storage performance of agar-derived carbon aerogels, *Carbon* 147 (2019) 451-459. <https://doi.org/10.1016/j.carbon.2019.03.011>.
- [6] M. Yin, H. Miao, B. Chen, R. Hu, L. Xia, C. Zhang, F. Wang, H. Zhang, J. Yuan, Self-supported metal sulfide electrode for flexible quasi-solid-state zinc-air batteries, *J. Alloys Compd.* 878 (2021) 160434. <https://doi.org/10.1016/j.jallcom.2021.160434>.
- [7] Y. Qi, Y. Zhang, L. Yang, Y. Zhao, Y. Zhu, H. Jiang, C. Li, Insights into the activity of nickel boride/nickel heterostructures for efficient methanol electrooxidation, *Nat. Commun.* 13 (2022) 4602. <https://doi.org/10.1038/s41467-022-32443-5>.

- [8] T.T. Li, T.Y. Jing, D.W. Rao, X.T. Jia, Y.P. Zuo, S. Kment, R. Zboril, In situ coating amorphous boride on ternary pyrite-type boron sulfide for highly efficient oxygen evolution, *J. Mater. Chem. A* 9 (2021) 12283-12290. <https://doi.org/10.1039/d0ta10633j>.
- [9] Y.K. Liu, S. Jiang, S.J. Li, L. Zhou, Z.H. Li, J.M. Li, M.F. Shao, Interface engineering of (Ni, Fe)S<sub>2</sub>@MoS<sub>2</sub> heterostructures for synergetic electrochemical water splitting, *Appl. Catal., B* 247 (2019) 107-114. <https://doi.org/10.1016/j.apcatb.2019.01.094>.
- [10] Y.Y. Wu, Y. Li, M.K. Yuan, H.R. Hao, X.J. San, Z. Lv, L.L. Xu, B. Wei, Operando capturing of surface self-reconstruction of Ni<sub>3</sub>S<sub>2</sub>/FeNi<sub>2</sub>S<sub>4</sub> hybrid nanosheet array for overall water splitting, *Chem. Eng. J.* 427 (2022) 131944. <https://doi.org/10.1016/j.cej.2021.131944>.
- [11] B. Fei, Z.L. Chen, J.X. Liu, H.B. Xu, X.X. Yan, H.L. Qing, M. Chen, R.B. Wu, Ultrathinning nickel sulfide with modulated electron density for efficient water splitting, *Adv. Energy Mater.* 10 (2020) 2001963. <https://doi.org/10.1002/aenm.202001963>.
- [12] J.F. Qin, M. Yang, S. Hou, B. Dong, T.S. Chen, X. Ma, J.Y. Xie, Y.N. Zhou, J. Nan, Y.M. Chai, Copper and cobalt co-doped Ni<sub>3</sub>S<sub>2</sub> grown on nickel foam for highly efficient oxygen evolution reaction, *Appl. Surf. Sci.* 502 (2020) 144172. <https://doi.org/10.1016/j.apsusc.2019.144172>.
- [13] Y.P. Liu, Q.J. Li, R. Si, G.D. Li, W. Li, D.P. Liu, D.J. Wang, L. Sun, Y. Zhang, X.X. Zou, Coupling sub-nanometric copper clusters with quasi-amorphous cobalt sulfide yields efficient and robust electrocatalysts for water splitting reaction, *Adv. Mater.* 29 (2017) 1606200. <https://doi.org/10.1002/adma.201606200>.
- [14] Y.Y. Wu, Y.P. Liu, G.D. Li, X. Zou, X.R. Lian, D.J. Wang, L. Sun, T. Asefa, X.X. Zou, Efficient electrocatalysis of overall water splitting by ultrasmall Ni<sub>x</sub>Co<sub>3-x</sub>S<sub>4</sub> coupled Ni<sub>3</sub>S<sub>2</sub> nanosheet arrays, *Nano Energy* 35 (2017) 161-170. <https://doi.org/10.1016/j.nanoen.2017.03.024>.

- [15] Z.X. Jing, Q.Y. Zhao, D.H. Zheng, L. Sun, J.H. Geng, Q.N. Zhou, J.J. Lin, Nickel-doped pyrrhotite iron sulfide nanosheets as a highly efficient electrocatalyst for water splitting, *J. Mater. Chem. A* 8 (2020) 20323-20330. <https://doi.org/10.1039/d0ta07624d>.
- [16] L.L. Wu, Y.X. Yang, X.H. Chen, J. Luo, H.C. Fu, L. Shen, H.Q. Luo, N.B. Li,  $\text{Cu}_2\text{O}@\text{Fe-Ni}_3\text{S}_2$  nanoflower in situ grown on copper foam at room temperature as an excellent oxygen evolution electrocatalyst, *Chem. Commun. (Camb.)* 56 (2020) 12339-12342. <https://doi.org/10.1039/d0cc04893c>.
- [17] W. Xu, C. Zhang, H.T. Shen, X.X. Ma, Z.H. Cheng, J. Wu, Q.Z. Zhu, J. Lin, Z.G. Fu, H.Y. Deng, Surface oxalate coordination: facilitating basic OER activity by regulating the electronic structure of  $\text{Fe-Ni}_3\text{S}_2$ , *ACS Sustainable Chem. Eng.* 10 (2022) 14396-14406. <https://doi.org/10.1021/acssuschemeng.2c02456>.
- [18] W. Fang, P. Dai, H. Hu, T. Jiang, H. Dong, M. Wu,  $\text{Fe}_{0.96}\text{S}/\text{Co}_8\text{FeS}_8$  nanoparticles co-embedded in porous N, S codoped carbon with enhanced bifunctional electrocatalytic activities for all-solid-state Zn-air batteries, *Appl. Surf. Sci.* 505 (2020) 144212. <https://doi.org/10.1016/j.apsusc.2019.144212>.
- [19] Z. Zhang, H. Sun, J. Li, Z. Shi, M. Fan, H. Bian, T. Wang, D. Gao, S-doped  $\text{CoMn}_2\text{O}_4$  with more high valence metallic cations and oxygen defects for zinc-air batteries, *J. Power Sources* 491 (2021) 229584. <https://doi.org/10.1016/j.jpowsour.2021.229584>.
- [20] B. Chen, H. Miao, M. Yin, R. Hu, L. Xia, C. Zhang, J. Yuan, Mn-based spinels evolved from layered manganese dioxides at mild temperature for the robust flexible quasi-solid-state zinc-air batteries, *Chem. Eng. J.* 417 (2021) 129179. <https://doi.org/10.1016/j.cej.2021.129179>.
- [21] X.Y. Wu, H. Miao, M.M. Yin, R.G. Hu, F. Wang, H.C. Zhang, L. Xia, C.F. Zhang, J.L. Yuan,

- Biomimetic construction of bifunctional perovskite oxygen catalyst for zinc-air batteries, *Electrochim. Acta* 399 (2021) 139407. <https://doi.org/10.1016/j.electacta.2021.139407>.
- [22] L. Sun, S. Huang, X. Zhao, L. Li, X. Zhao, W. Zhang, Synergistic effect of  $\text{Co}_9\text{S}_8$  and  $\text{FeS}_2$  inlaid on N-doped carbon nanofibers toward a bifunctional catalyst for Zn-air batteries, *Langmuir* 38 (2022) 11753-11763. <https://doi.org/10.1021/acs.langmuir.2c01882>.
- [23] K.K. Wang, Z.S. Lin, Y. Tang, Z.H. Tang, C.L. Tao, D.D. Qin, Y. Tian, Selenide/sulfide heterostructured  $\text{NiCo}_2\text{Se}_4/\text{NiCoS}_4$  for oxygen evolution reaction, hydrogen evolution reaction, water splitting and Zn-air batteries, *Electrochim. Acta* 368 (2021) 137584. <https://doi.org/10.1016/j.electacta.2020.137584>.
- [24] M. Yin, H. Miao, J. Dang, B. Chen, J. Zou, G. Chen, H. Li, High-performance alkaline hybrid zinc batteries with heterostructure nickel/cobalt sulfide, *J. Power Sources* 545 (2022) 231902. <https://doi.org/10.1016/j.jpowsour.2022.231902>.
- [25] T. Jiang, P. Dai, W. Zhang, M. Wu, Fish bone-derived N, S co-doped interconnected carbon nanofibers network coupled with  $(\text{Fe, Co, Ni})_9\text{S}_8$  nanoparticles as efficient bifunctional electrocatalysts for rechargeable and flexible all-solid-state Zn-air battery, *Electrochim. Acta* 373 (2021) 137903. <https://doi.org/10.1016/j.electacta.2021.137903>.
- [26] J. Zou, D. Qiu, G. Chen, H. Miao, J. Dang, L. Xia, Q. Wang, H. Zhang, J. Yuan, Greatly enhancing the bifunctional oxygen catalytic activities of cobalt-based perovskites by anchoring metal sulfides, *J. Alloys Compd.* 933 (2023) 167817. <https://doi.org/10.1016/j.jallcom.2022.167817>.
- [27] S. Ren, X. Duan, F. Ge, Z. Chen, Q. Yang, M. Zhang, H. Zheng, Novel MOF-derived hollow CoFe alloy coupled with N-doped ketjen black as boosted bifunctional oxygen catalysts for Zn-air batteries, *Chem. Eng. J.* 427 (2022) 131614. <https://doi.org/10.1016/j.cej.2021.131614>.



- [28] J.X. Dang, M.M. Yin, D.H. Pan, Z.Q. Tian, G.M. Chen, J.Q. Zou, H. Miao, Q. Wang, J.L. Yuan, Four-functional iron/copper sulfide heterostructure for alkaline hybrid zinc batteries and water splitting, *Chem. Eng. J.* 457 (2023) 141357. <https://doi.org/10.1016/j.ccej.2023.141357>.
- [29] C.-C. Weng, J.-T. Ren, H.-Y. Wang, X.-W. Lv, Y.-J. Song, Y.-S. Wang, L. Chen, W.-W. Tian, Z.-Y. Yuan, Triple-phase oxygen electrocatalysis of hollow spherical structures for rechargeable Zn-Air batteries, *Appl. Catal., B* 307 (2022) 121190. <https://doi.org/10.1016/j.apcatb.2022.121190>.
- [30] J. Zou, B. Chen, B. Li, M. Yin, H. Miao, F. Wang, C. Zhang, H. Zhang, J. Yuan, Achieving high energy efficiency of alkaline hybrid zinc battery by using the optimized Co–Mn spinel cathode, *Int. J. Hydrogen Energy* 47 (2022) 27470-27480. <https://doi.org/10.1016/j.ijhydene.2022.06.082>.
- [31] Z. Yang, J. Gao, P. Zhu, X. Zhao, G. Wang, S. Liu, Encapsulated  $\text{Co}_x\text{S}_y$  nanoparticles decorated S, N-doped mesoporous carbon as effective bifunctional oxygen electrocatalyst in rechargeable Zn-air battery, *J. Alloys Compd.* 858 (2021) 157665. <https://doi.org/10.1016/j.jallcom.2020.157665>.
- [32] R. Li, X.J. Liu, W.H. Liu, Z.B. Li, K.C. Chan, Z.P. Lu, Design of hierarchical porosity via manipulating chemical and microstructural complexities in high-entropy alloys for efficient water electrolysis, *Adv. Sci.* 9 (2022) 2105808. <https://doi.org/10.1002/advs.202105808>.
- [33] R.G. Hu, F.Y. Liu, H.Q. Qiu, H. Miao, Q. Wang, H.C. Zhang, F. Wang, J.L. Yuan, High-property anode catalyst compositing Co-based perovskite and NiFe-layered double hydroxide for alkaline seawater splitting, *Processes* 10 (2022) 668. <https://doi.org/10.3390/pr10040668>.
